# Supplementary material for: The subpolar gyre regulates silicate concentrations in the North Atlantic
Source: Springer Nature journal article supplement (doi:10.1038/s41598-017-14837-4), 2017-10-31
Supplement: MOESM1 [file 41598_2017_14837_MOESM1_ESM.pdf]

# Supplementary Information for

## The subpolar gyre regulates silicate concentrations in the North Atlantic

H. Hátún, J. Ólafsson, K. Azetsu-Scott, R. Somavilla, F. Rey, C. Johnson,  
M. Mathis, U. Mikolajewicz, P. Coupel, J-É. Tremblay, S. Hartman, S.V. Pacariz and I. Salter.

correspondence to: [hjalmarh@hav.fo](mailto:hjalmarh@hav.fo)

### **This PDF file includes:**

1. Materials and Methods
2. Supplementary Text
3. Supplementary Figs. S1 to S7

## 30 1. Materials and Methods

31

32 Silicate observations (see also Methods in the main manuscript)

33

34 The silicate observations reported here are from several independent hydrographic  
35 sections crossing the Atlantic Inflow branches as well as the potential Arctic and subtropical  
36 water mass sources (Fig. 1). The individual *primary datasets* have been sampled in a  
37 consistent way and should be regarded as reliable. These are from the Labrador Sea (L in  
38 Fig.1), the Irminger Sea (Ir) and the Nordic Seas (S,M,G), all shown with colored squares in  
39 Fig. 1, and plotted in Fig. 2a. *Supporting datasets* are also utilized to support the primary  
40 datasets and to investigate the causes for the marked silicate decline. These are from the  
41 Iceland Basin (Ic), the Faroe Shelf (F), the Labrador Shelf (LC), the Porcupine Abyssal Plain  
42 (P) and the Bay of Biscay (B), shown with the black circles in Fig. 1

43 Data were obtained from: the Bedford Institute for Oceanography (BIO), Canada, the  
44 Marine Research Institute (MRI), Iceland, the Scottish Association for Marine Science  
45 (SAMS), UK, the Faroe Marine Research Institute (FAMRI), Faroe Islands, the Institute of  
46 Marine Research (IMR), Norway, the National Oceanography Centre (NOC), UK, and from  
47 the Spanish Institute of Oceanography (IEO). Below we provide further details to the  
48 Methods section in the main text.

49

50 Table S1 Overview over the silicate datasets

| Location                    | Supplier | Depth (m)       | Month           | Comment    |
|-----------------------------|----------|-----------------|-----------------|------------|
| Labrador Sea (L)            | BIO      | 150-500         | May             | Primary    |
| Irminger Sea (Ir)           | MRI      | 0-50            | Feb-March       | Primary    |
| Nordic Seas (S,M,G)         | IMR      | 0-200           | March           | Primary    |
| Iceland Basin (Ic)          | SAMS     | 150-600         | Summer (varies) | Supporting |
| Faroe Shelf (F)             | FAMRI    | 18              | Dec-Feb         | Supporting |
| Labrador Shelf (LC)         | BIO      | Hydr. criterion | May             | Supporting |
| Porcupine Abyssal Plain (P) | NOC      | Surface         | March           | Supporting |
| Bay of Biscay (B)           | IEO      | 150 and 400     | Every month     | Supporting |

51

52 In the central *Labrador Sea* (L, Fig. 1 and Table S1), all deep stations along the WOCE  
53 line ARW7, referenced in the Fisheries and Oceans Canada (DFO) BioChem oceanographic  
54 database (55.75-59.50°N, 53.50-49.50°W) were averaged from 150-500 m. The silicate  
55 concentrations were determined at the BIO using a Technicon Autoanalyzer II characterized  
56 by a 0.1  $\mu\text{M}$  detection limit.

57 The *Irminger Sea* (Ir in Fig. 1 and Table S1) samples (64.33°N, 27.95°W) were  
58 analyzed for dissolved silicate with standard so-called colorimetric methods, and the long  
59 term accuracy has been estimated to  $\pm 0.2 \mu\text{M}$ . Details of the analytical methods and quality  
60 assurance can be found in (ref. 42).

61 For the *Nordic Seas* observation sites (S, M and G, Fig. 1 and Table S1), samples were  
62 taken in the upper mixed layer. This is defined as the shallowest of either the upper 200 m, or  
63 the depths where the water density difference is less than 0.05 relative to the surface value<sup>14</sup>.  
64 Samples were only taken in Atlantic Water, identified by salinities greater than 35 and  
65 temperatures above 2°C.

66 The *Iceland Basin* (Ic in Fig. 1 and Table S1) time-series was calculated by averaging all  
67 silicate samples from four stations along the 20°W portion of the Extended Ellett Line (EEL)  
68 - latitude range 61.50 – 62.33°N (Fig. 4). Details of the analytical methods can be found in

69 (ref. 18). The EEL cruises are usually during the summer, but not at the same time each year.  
70 A station-wise rate of change analysis reveals an increasingly negative trend towards Iceland  
71 (Fig. S1)

72 For the *Faroe Shelf* (F in Fig. 1 and Table S1), the coastal station (Skopun, 61.91°N,  
73 6.89°W) pumps water from 18 m depth and silicate samples have been collected twice a  
74 week since 1995. The nutrient samples were preserved with 12 drops of chloroform per 100  
75 ml of seawater in polyethylene bottles and measured 3-6 months later according to (ref. 43).

76 Data for the *Canadian Arctic Archipelago passages* (Lancaster Sound, Smith Sound and  
77 Hudson strait, Fig. S6) come from the annual Arctic Net cruises (1998-2013) conducted on-  
78 board the icebreaker Amundsen between July and October each year. The sampling and  
79 analysis of the silicate concentrations were performed at University Laval according to the  
80 method described in (ref. 8). Data prior to 1998 come from the ICES Data Centre  
81 (<http://ices.dk/>).

82 For the *Labrador Shelf* (LC, Fig. 1 and Table S1), the silicate concentrations have been  
83 averaged over the depth layer 50 -150 m, to avoid the impact of near-surface biological  
84 activity (Fig. 5).

85 The *Porcupine Abyssal Plain* (PAP, P in Fig. 1 and Table S1) sustained observatory site  
86 is described in (ref. 44). For comparisons with sensors at the site, surface nutrient data was  
87 collected from a ship of opportunity on the UK-Caribbean route<sup>45</sup>. This data set was sub  
88 sampled for the region 45-52°N, 26.08-8.92°W to be close to the PAP site. On the UK-  
89 Caribbean ship of opportunity route samples were collected and frozen on-board each month  
90 for analysis ashore using a Skalar auto-analyser<sup>46</sup>. Working standards were compared with  
91 standards prepared by Ocean Scientific International (OSI) to ensure the results were  
92 consistent from month to month. The precision obtained was assessed through duplicate  
93 measurements as 0.1%.

94 For the southern *Bay of Biscay* (B in Fig. 1 and Table S1), silicate concentrations at the  
95 northern station of the Santander standard section (150 m, 43.80°N, 3.78°W, 2580 m bottom  
96 depth) is representative of the winter silicate concentration in the mixed layer (Fig. 3). The  
97 samples for silicate were frozen and subsequently concentrations determined with a  
98 Technicon autoanalyzer. For comparison these are plotted together with the near-surface  
99 winter (March) silicate concentrations around the PAP mooring (see above) (Fig. 3).

100  
101 Ocean model description (see also Methods in the main manuscript)

102  
103 The primitive equations of oceanic motion in the MPIOM are discretized on an Arakawa  
104 C-grid with z-coordinates and free surface, including hydrostatic and Boussinesq  
105 approximations. Tracer and momentum advection follows a second order total variation  
106 diminishing scheme after (ref. 47). Vertical mixing is performed after (ref. 48) with an  
107 additional parameterization for wind stirring<sup>39</sup>. In the model version described here, the full  
108 ephemeridic luni-solar tidal potential is included according to (ref. 49). A detailed model  
109 description and evaluation is given in (refs. 50,51). For the specific application to the  
110 northern North Atlantic region, a stretched grid configuration has been used with non-  
111 diametrical poles located in southwest Germany and Wisconsin (USA).

112 Biogeochemical cycles and trophic levels in HAMOCC are connected by nutrient uptake  
113 and remineralization of organic matter, including co-limitation by major macro and micro  
114 nutrients, such as phosphate, nitrate, and dissolved iron<sup>52, 53</sup>. A sediment module accounts for  
115 deposition processes of solid constituents as well as for the biogeochemistry of pore water  
116 tracers in the upper bioturbated sediments<sup>53</sup>. Resuspension in the model configuration  
117 described here is implemented after (ref. 54). Tracer transport is simulated by MPIOM.

118 The simulation has been initialized by a spin-up run of 120 years with repeated forcing  
119 of the first 20 years of ERA40 data (1958-1977). River runoff is prescribed as monthly  
120 climatological means, calculated by the Hydrological Discharge model<sup>55</sup>.

### 121 Additional funding information

122  
123  
124 The acquisition and compilation of silicate data from the western Arctic was  
125 supported by the Network Center of Excellence ArcticNet and Fisheries and Oceans, Canada,  
126 Atlantic Zone Offshore Monitoring Program (AZOMP). The captains and the crew of *CCGS*  
127 *Hudson*, chief scientists and scientific parties of AZOMP are acknowledged. The analysis of  
128 silicate data from the Labrador Sea was supported by a grant from the National Sciences and  
129 Engineering Research Council of Canada to the CCAR network VITALS (Ventilation and  
130 Transports across the Labrador Sea).

131 The EEL is funded through UK NERC's National Capability program.

132 The nutrient analysis of the Santander standard section has been performed in  
133 relationship with the project Radiales funded by the Spanish Institute of Oceanography.

134 The PAP sustained observatory work was supported through the Natural Environment  
135 Research Council (NERC), UK, project Oceans 2025 and National Capability. The PAP-SO  
136 and ship of opportunity in that region also contribute to the EU funded FixO3 project EU  
137 312463 and the NERC Greenhouse Gas TAP NE/k00249x/1.

## 138 **2. Supplementary Text**

### 139 Validation of HAMOCC

141 The simulated silicate concentrations during April are comparable to World Ocean Atlas  
142 climatology (Fig. S2). A clear separation line between subpolar and subtropical water masses  
143 aligns with the North Atlantic Current and maximum concentrations are found in the  
144 Labrador Sea convections site, while elevated concentrations embed the northern Irminger  
145 Sea and Iceland Basin. The simulated concentrations in the Baffin Bay are, however, much  
146 lower than the representation in the World Ocean Atlas. Also note that the World Ocean  
147 Atlas shows highest silicate concentrations in the Irminger Sea region during March (Fig.  
148 S2a), followed by maximum values in the Labrador Sea during April (Fig. 2Sb).

149 In addition, primary production is in good agreement with satellite data presented in (ref. 56),  
150 with about  $580 \text{ mg C m}^{-2} \text{ d}^{-1}$  in the Central Irminger Sea,  $650 \text{ mg C m}^{-2} \text{ d}^{-1}$  in the Iceland  
151 Basin and  $750 \text{ mg C m}^{-2} \text{ d}^{-1}$  at Reykjanes Ridge during July to September 1998-2010.  
152 Moreover, observed annual cycles in the Irminger Sea of near-surface nitrate concentrations  
153 as well as phytoplankton and zooplankton abundances presented in (ref. 57) for the years  
154 2001 and 2002 are well reproduced by the model, with winter nitrate concentrations ranging  
155 between 10 and 14  $\mu\text{M}$ .

156 A linear regression analysis of the simulated near-surface (0 – 150 m) March silicate at each  
157 HAMOCC model grid for the period 1990-2011 reveals a significant negative trend in the  
158 following regions: *i*) At the entrance to the Rockall Trough (west of the British Isles) where  
159 several water masses with strongly contrasting properties meet, *ii*) along the periphery of the  
160 SPG through the Iceland Basin, the Reykjanes Ridge, the Irminger Sea and the Labrador Sea,  
161 *iii*) the south Iceland Shelf, *iv*) along the sub-arctic front in the Nordic Seas and *v*) in a region  
162 in the central SPG, south of Greenland (Fig. S3). This is likely due to the westward retracting  
163 SPG during this period<sup>11</sup>, and the associated replacement of silicate rich subarctic waters with

164 silicate poorer Atlantic waters along the retracting subarctic front. A similar westward  
165 retraction of the subarctic front in the Nordic Seas would also induce a silicate decline near  
166 the frontal zone there. Periods with weak atmospheric forcing result in both a declining  
167 SPG<sup>11, 12</sup> and a westward shift of the subarctic front in the Nordic Seas<sup>58</sup>.

168 The HAMOCC model shows very strong silicate variability in the central SPG since the late  
169 1950s, which closely follows the gyre index from (ref. 11), based on output from the Miami  
170 Isopycnal Coordinate Ocean Model (MICOM) (Fig. S4). The negative trend in the central  
171 SPG (54-56°N, 48-45°W, blue blob south of Greenland in Fig. S3) is primarily caused by an  
172 extreme drop of nearly 6  $\mu\text{M}$  during the years 1995-1999, when the gyre suddenly declined<sup>11</sup>.

173 HAMOCC, however, does not show a significant decline along the WOCE line ARW7 (Fig.  
174 S3) where the observations show a clear silicate decrease (Fig. 2 and Table 1). It is well  
175 known that such model systems can produce realistic temporal variability associated with  
176 deep convection, but they seldom correctly identify the location of real convection regions.  
177 The general circulation model MPIOM, which is the physical component of HAMOCC, has  
178 such limitations, and this could explain the likely spurious spatial pattern within the central  
179 SPG.

180

#### 181 Arctic silicate flux estimate

182

183 Since 1997, the Arctic system has been under the influence of an anticyclonic circulation  
184 regime, described as a positive phase of the Arctic Ocean Oscillation<sup>26</sup>. Under these  
185 conditions, wind forcing leads to freshwater (FW) accumulation in the Arctic Ocean through  
186 Ekman convergence and thus a reduction of the FW flux to the North Atlantic subpolar  
187 regions (Fig. S7b). Most of the FW accumulation occurs in the Beaufort Gyre, where not only  
188 Pacific Water (PW) rich in silica accumulates, but also FW from river runoff<sup>59</sup> with even  
189 higher silicate concentrations<sup>60</sup> converges. Estimates of the FW build up in the Beaufort Gyre  
190 since the mid-1990s range between 8,000 km<sup>3</sup> and 12,000 km<sup>3</sup> (refs. 28, 61). Knowing the  
191 silicate concentrations representative of this FW enables us to estimate the associated  
192 reduction in Arctic silicate flux to the subpolar North Atlantic Ocean.

193 *Silicate concentration representative of the FW accumulated in the Beaufort Gyre.*

194 Estimations of FW accumulation in the Arctic are made with respect to the 34.8  
195 isohaline, typically located within the upper 350 m depth in the Canada Basin. Above it (50-  
196 250 m depths), a silicate maximum ( $\sim 35 \mu\text{M}$ ) is observed, associated with the PW (e.g. Fig. 7  
197 in ref. 9). The PW halocline is found between the PW core and the 34.8 isohaline, with lower  
198 but still high silicate concentrations.

199 On its way from the Canada Basin through the Canadian Arctic Archipelago to Davis  
200 Strait, homogenization of the Pacific-origin waters occurs as noted by (ref. 8). Similar total  
201 levels of salt and silicate are found in the upper 150 m for Silicate-Rich Arctic Water (SRAW)  
202 in Baffin Bay and the Canada Basin. Thus, the silicate concentration in the homogenized  
203 SRAW ( $\sim 22 \mu\text{M}$ )<sup>8</sup> is assumed to be representative of the Pacific-origin waters in the Canada  
204 Basin. In order to estimate the silicate accumulation in the Beaufort Gyre ( $\sum \text{Si}_{\text{BG}}$ ), a reference  
205 silicate concentration, here represented by the mean concentration of the Arctic, must be  
206 subtracted from the SRAW concentration. Using the Pangaea data set  
207 (<https://www.pangaea.de/>), we get  $\text{Si}_{\text{ref}} \sim 11 \mu\text{M}$ . This gives:

208

209  $\sum Si_{BG(I)} = FW_{BG} [8000-12000 \text{ km}^3] \cdot (22 \text{ } \mu\text{M} - 11 \text{ } \mu\text{M})$   
 210  $= -[8.8-13.2] \cdot 10^{16} \text{ } \mu\text{mol}$

211

212 Alternatively, we could estimate  $\sum Si_{BG}$  from the silicate maximum of the PW,  
 213 previously estimated to contribute 50% to the total FW content in the Beaufort Gyre<sup>62</sup>.

214

215  $\sum Si_{BG(II)} = 0.5 \cdot FW_{BG} [8000-12000 \text{ km}^3] \cdot (35 \text{ } \mu\text{M} - 11 \text{ } \mu\text{M})$   
 216  $= -[9.6-14.4] \cdot 10^{16} \text{ } \mu\text{mol}$

217

218

219 *Contribution to the subpolar North Atlantic.*

220 According to (ref. 9), between 85 and 100% of the silicate in the Arctic leaves the basin  
 221 through the Canadian Arctic Archipelago, mainly in the density range  $\sigma_\theta = 27.0 - 27.5$ . Based  
 222 on the climatological distribution of the 27.0 and 27.5 isopycnals in the North Atlantic  
 223 (including the Labrador and Irminger seas), we estimate the volume into which the SRAW  
 224 potentially would redistribute:  $V_{NAII} = 4.11 \cdot 10^{14} \text{ m}^3$ .

225 The silicate decrease in the subpolar North Atlantic, caused by the retention of silicate in  
 226 the Arctic Ocean (assuming that 90% reaches the North Atlantic) is therefore:

227

228  $\Delta Si_{NAII} (I) = 0.90 \cdot \sum Si_{BG(I)} / V_{NAII} = -0.90 \cdot [8.8-13.2] \cdot 10^{16} \text{ } \mu\text{mol} / 4.11 \cdot 10^{14} \text{ m}^3$   
 229  $= -(0.19-0.29) \text{ } \mu\text{M}$

230

231  $\Delta Si_{NAII} (II) = 0.90 \cdot \sum Si_{BG(II)} / V_{NAII} = -0.90 \cdot [9.6-14.4] \cdot 10^{16} \text{ } \mu\text{mol} / 4.11 \cdot 10^{14} \text{ m}^3$   
 232  $= -(0.21-0.33) \text{ } \mu\text{M}$

233

234 Thus, the accumulation of SRAW in the Beaufort Gyre and Canada Basin could explain  
 235 up to 10-20% of the total silicate decline observed in the subpolar North Atlantic (1.5-2  $\mu\text{M}$ ).  
 236 A more realistic estimate must, however, include changes in FW transport into the Arctic  
 237 through the Bering Strait.

238

239 *FW transports through Bering Strait.*

240 The annual FW transport through the Bering Strait has increased from 2000–2500  $\text{km}^3$  in  
 241 2001 to 3000-3500  $\text{km}^3$  in 2011<sup>29</sup>. Assuming a linear increase as observed in ref. 29 (100  $\text{km}^3$   
 242 per year over ten years), this would result in a FW increase of 5000  $\text{km}^3$  from 2001 to 2011,  
 243 which is about half of the observed FW accumulated in the Beaufort Gyre.

244 On the other hand, a 26% decrease in the FW transport through Davis Strait from 4500  $\pm$   
 245 730  $\text{km}^3$  for the period 1987-1990 to 3300  $\pm$  220  $\text{km}^3$  for the period 2004-2010 would explain  
 246 up to 10,000  $\text{km}^3$  of FW accumulation in the Arctic<sup>52</sup>. Together, they would result in a FW  
 247 accumulation of 15,000  $\text{km}^3$ , ~1/3 contribution from Bering Strait FW transports and ~2/3  
 248 from Davis Strait FW transports.

249 Thus accounting for the increased Bering Strait FW contribution to the observed  
 250 Beaufort Gyre FW accumulation since the mid-1990s, we estimate the Arctic contribution to  
 251 the North Atlantic silicate decline (1.5-2  $\mu\text{M}$ , Fig. 2a) to be less than 15%.

252

253

254

255 **3. Supplementary Figures**

256

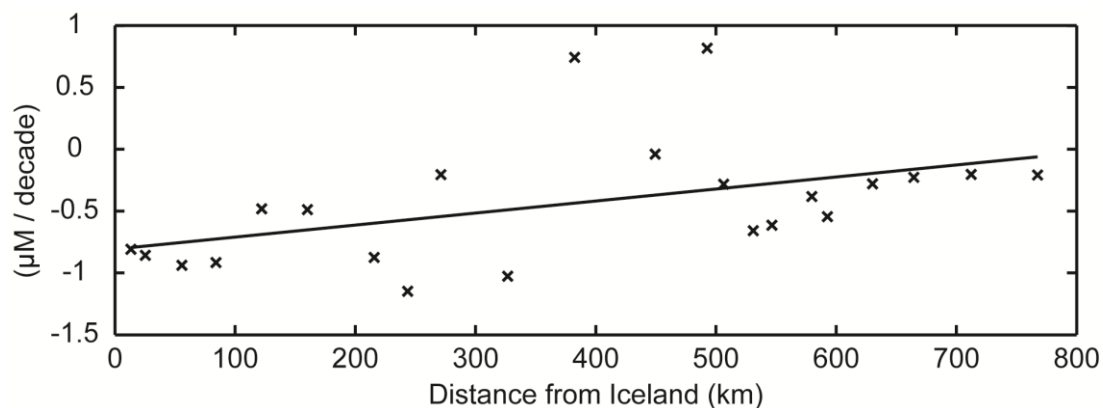

257

258 **Fig. S1** Rate of change in silicate concentrations between 150-600 m from 1997 to 2015 for  
259 each EEL station between Iceland (0 km) and Rockall (800 km) (see Fig. 4). Only stations  
260 where data from more than five cruises are available have been included. The rate of change  
261 has been calculated by a least square analysis.

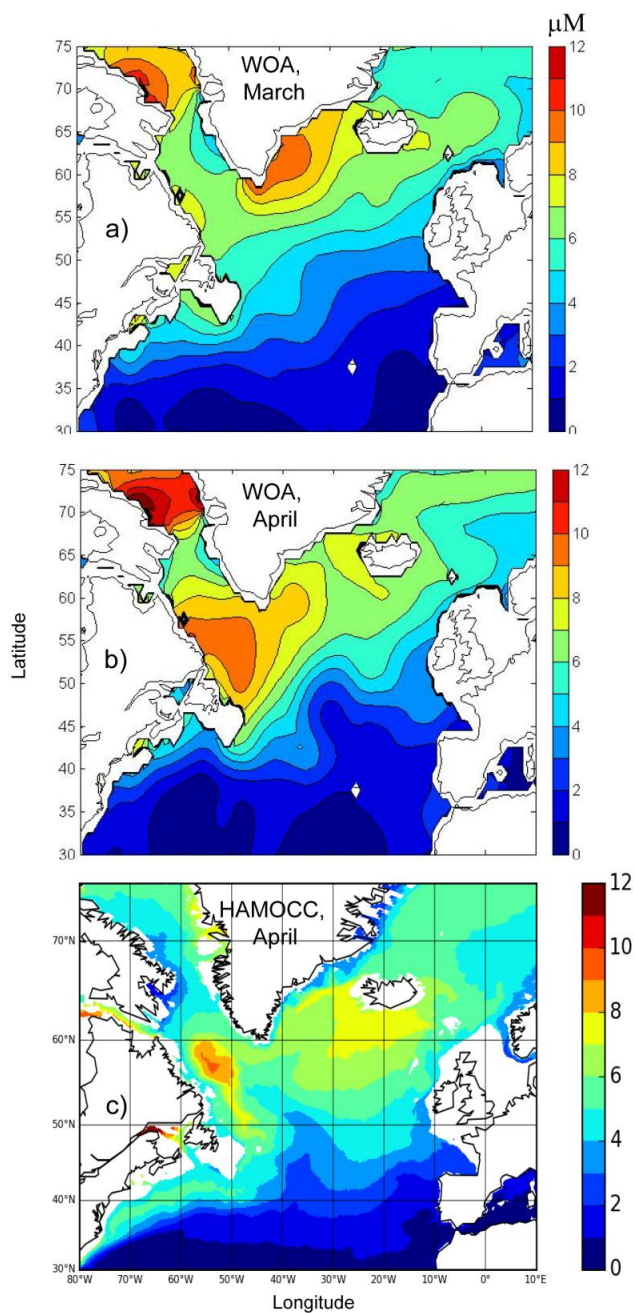

263

264 **Fig. S2 Climatological upper-ocean (average over 0-200 m) silicate concentrations.**  
 265 Panels a) and b) show the representation in the World Ocean Atlas (WOA<sup>20</sup>) for March and  
 266 April, respectively and c) shows the simulated values from HAMOCC for April (1960-2012).  
 267 The figure was produced using the softwares Matlab R2013b, (<https://www.mathworks.com>)  
 268 (panels a) and b) and the Python programming language (Python Software Foundation.  
 269 Python Language Reference, version 2.7, available at <http://www.python.org>).



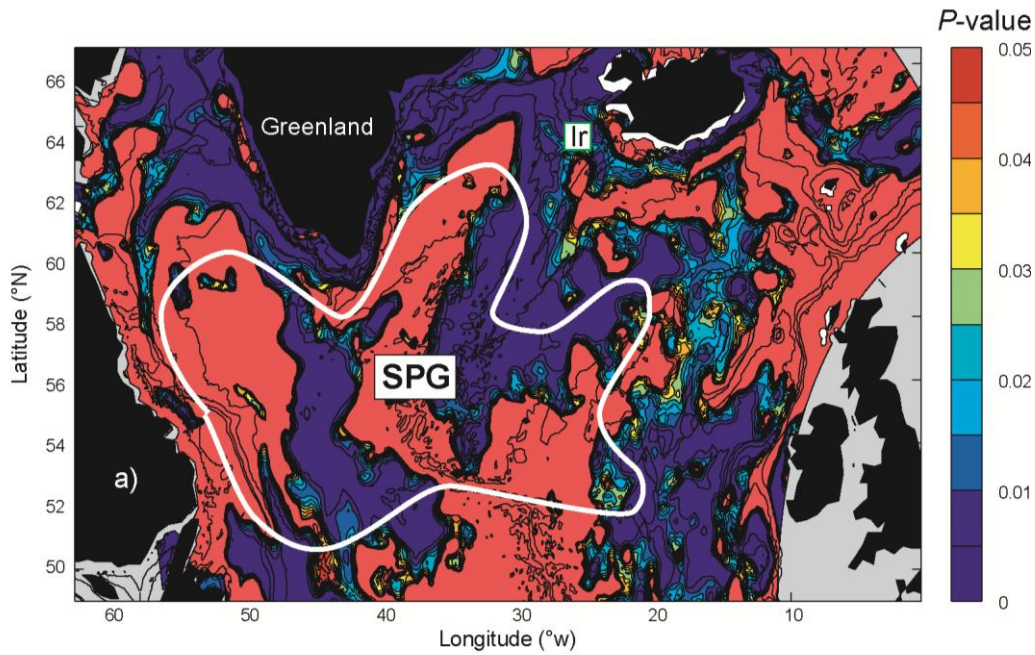

270

271 **Fig. S3 Linear trend in the simulated (HAMOCC) near-surface (0 – 150 m) silicate**  
 272 **during March.** The colors show *P*-values from a linear regression analysis of the silicate at  
 273 each model grid for the period 1990-2011. The blue colors represent the regions where a  
 274 declining trend is simulated, and the areas colored red show no clear trend. The rough outline  
 275 of the subpolar gyre (SPG) is depicted with the white curve. The figure was produced using  
 276 the software Matlab R2013b, (<https://www.mathworks.com>).

277

278

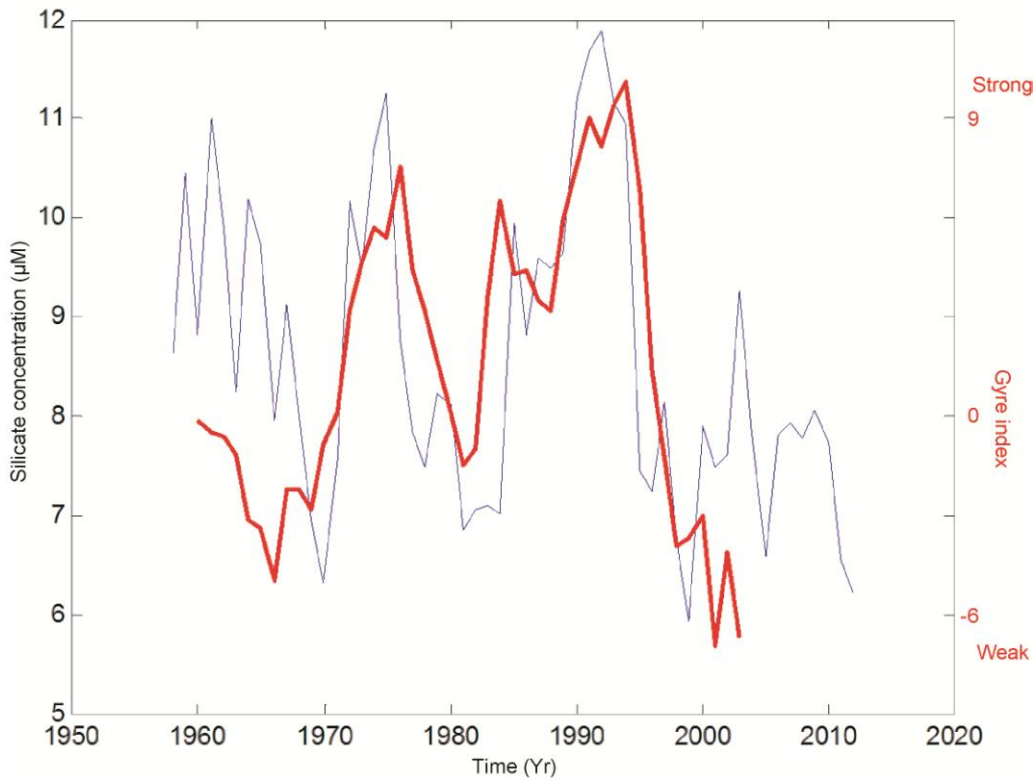

279

280

281 **Fig. S4** Simulated near-surface (0-200 m) March silicate concentration (HAMOCC) in the  
 282 central SPG (54-56°N, 48-45°W) and the gyre index presented by (ref. 11) (red), which was  
 283 based on the Miami Isopycnal Coordinate Ocean Model (MICOM).

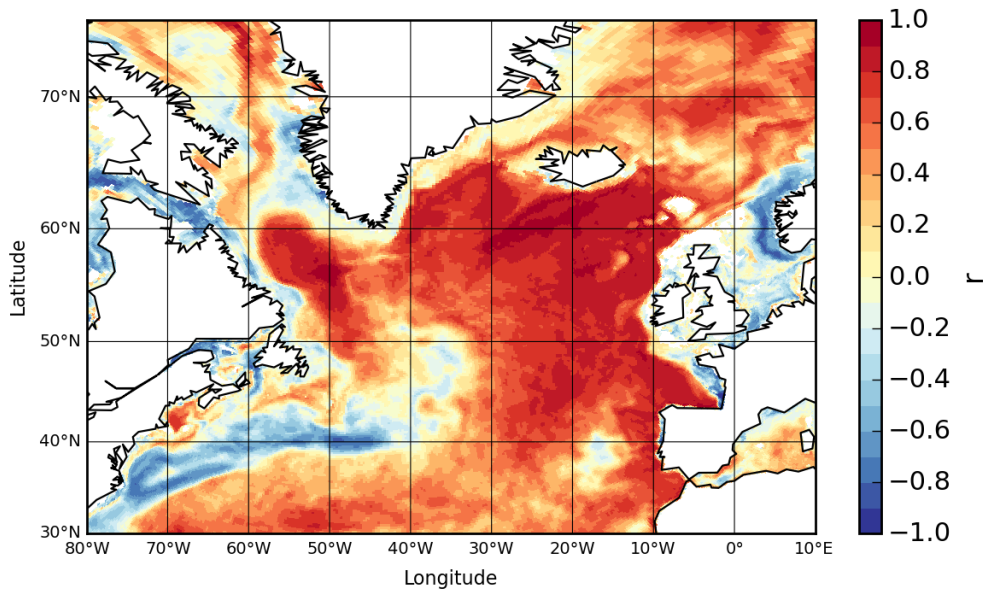

284

285 **Fig. S5** Correlations between the simulated winter (DJF) near-surface silicate  
 286 concentrations, and the mixed layer depth (DJF) at every model (HAMOCC) grid-point  
 287 for the years from 1958 to 2012. The figure was produced using the Python programming  
 288 language (Python Software Foundation. Python Language Reference, version 2.7, available at  
 289 <http://www.python.org>).

290  
291

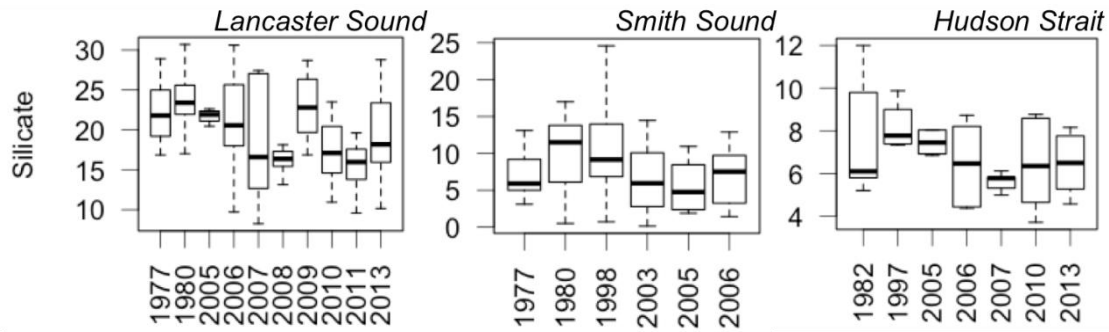

292

293 **Fig. S6.** Temporal changes of the silicate concentration ( $\mu\text{M}$ ) in the Arctic Outflow at three  
294 passages through the Canadian Arctic Archipelago: Lancaster Sound (50-150 m), Smith  
295 Sound (0-100 m) and Hudson Strait (50-150 m).

296

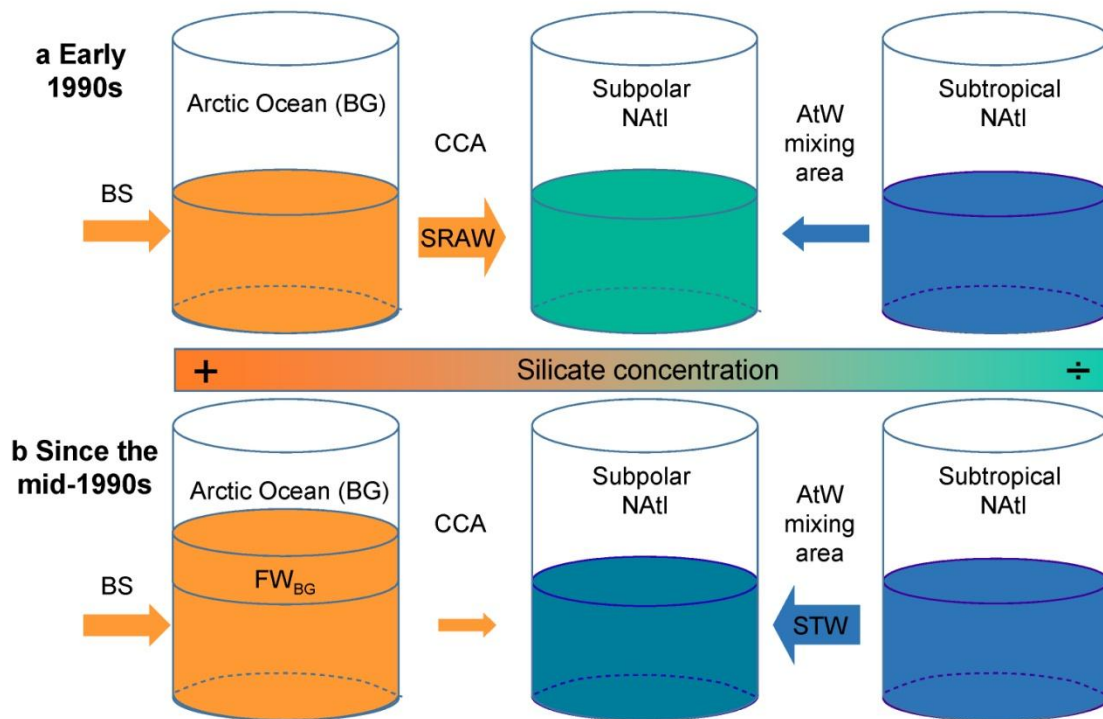

297

298 **Fig. S7. Schematic diagram of Silicate-Rich Arctic Water (SRAW) and subtropical**  
299 **Water (STW) contributions to the silicate content in the subpolar North Atlantic. a)** The  
300 situation at the beginning of the 1990s, after the large loss of Arctic Freshwater content and  
301 before the beginning of large fresh water accumulation in the Beaufort Gyre (BG) since the  
302 mid-1990s. **b)** After the mid-1990s, with SRAW of Pacific origin accumulation in the BG  
303 (FW<sub>BG</sub>) through Ekman convergence and reduction of SRAW flux to the North Atlantic  
304 Subpolar regions. BS, Bering Strait; CAA, Canadian Arctic Archipelago.

305
